# Supplementary material
Source: MDPI journal article supplement (https://www.mdpi.com/2075-4701/11/5/756)
Supplement: s1 [file s1 › metals-1201819-supplementary.pdf]

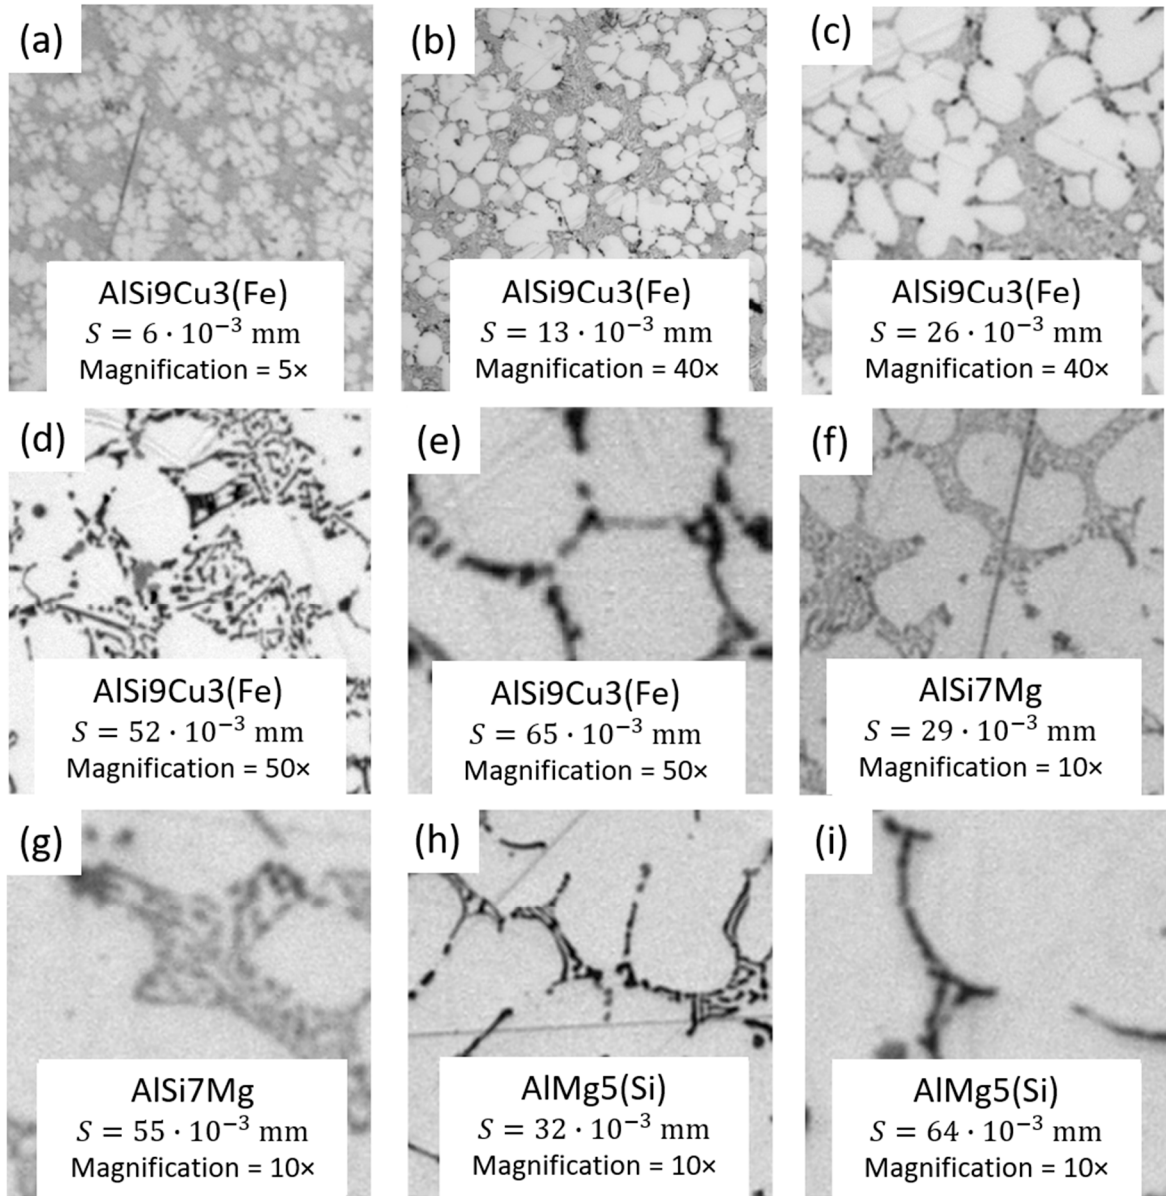

**Figure S1.** Images used for training (Figure 3, full resolution).

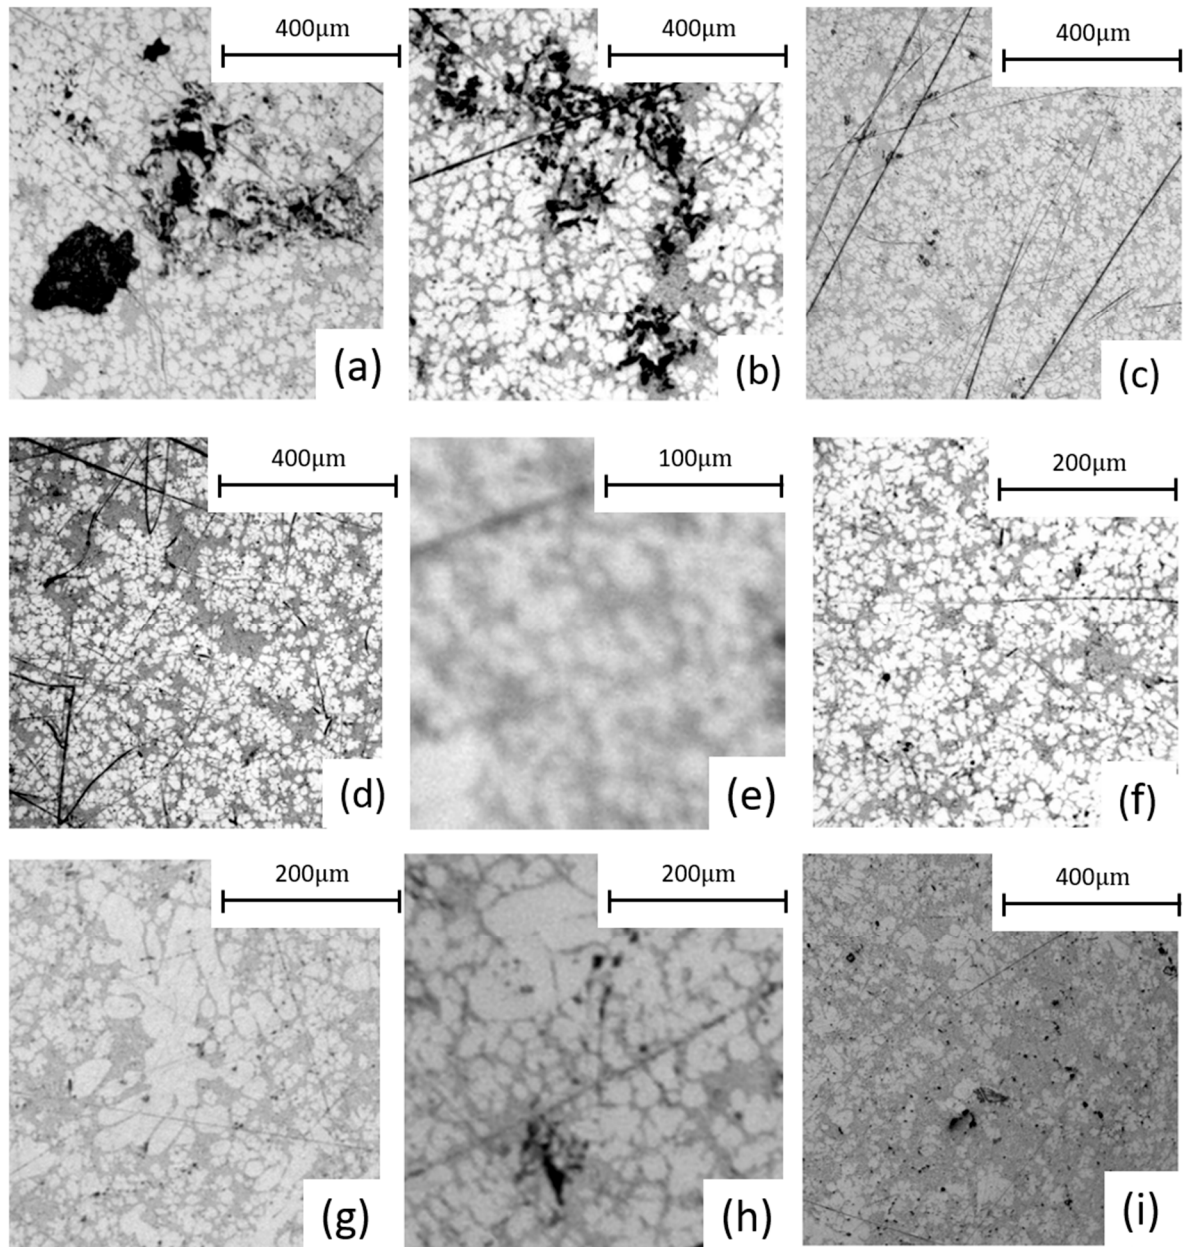

**Figure S2.** Images of different types of defects used for the training (Figure 4, full resolution)
